# Supplementary material for: Risk of Death Following Application of Paclitaxel‐Coated Balloons and Stents in the Femoropopliteal Artery of the Leg: A Systematic Review and Meta‐Analysis of Randomized Controlled Trials
Source: PubMed Central journal article supplement — J Am Heart Assoc. 2018 Dec 6;7(24):e011245. doi: 10.1161/JAHA.118.011245 (PMC6405619; doi:10.1161/jaha.118.011245), 2018-12-06
Supplement: JAH3-7-e011245-s001.pdf [file JAH3-7-e011245-s001.pdf]

# **SUPPLEMENTAL MATERIAL**

**Table S1. Design characteristics of the included randomized controlled trials\***

| Study and sources                  | Year and study design                             | Allocation in study arms                  | Paclitaxel coated device                      | Primary study endpoint                   | Maximum follow-up period | Study registration         | Dual antiplatelet therapy                        |
|------------------------------------|---------------------------------------------------|-------------------------------------------|-----------------------------------------------|------------------------------------------|--------------------------|----------------------------|--------------------------------------------------|
| ZILVER-PTX <sup>1-3</sup>          | 2011<br>Multi-center<br>Open label<br>(1:1)       | DES<br>(n=241) vs<br>PTA<br>(n=238)       | ZILVER-PTX<br>Stent by COOK<br>Medical        | Primary<br>Patency<br>at 1 year          | 5 years                  | NCT00120406                | >2 months                                        |
| THUNDER <sup>4,5</sup>             | 2008<br>Multi-center<br>Single-blind<br>(1:1:1)   | DCB<br>(n=48) vs<br>PTA<br>(n=54)         | Cotavance<br>Balloon by<br>Bavaria<br>Medizin | Late<br>Lumen<br>Loss at 6<br>months     | 5 years                  | NCT00156624                | 1 month                                          |
| IN.PACT SFA <sup>6-10</sup>        | 2015<br>Multi-center<br>Single-blind<br>(2:1)     | DCB<br>(n=220) vs<br>PTA<br>(n=111)       | IN.PACT<br>Admiral<br>by<br>Medtronic         | Primary<br>Patency<br>at 1 year          | 3 years                  | NCT01175850<br>NCT01566461 | 1 month<br>(3 months if<br>bail-out<br>stenting) |
| FEMPAC <sup>11</sup>               | 2008<br>Multi-center<br>Single-blind<br>(1:1)     | DCB<br>(n=45) vs<br>PTA<br>(n=42)         | Paccocath<br>Balloon by<br>Bavaria<br>Medizin | Late<br>Lumen<br>Loss at 6<br>months     | 2 years                  | NCT00472472                | Long-term<br>(not<br>specified)                  |
| LEVANT I <sup>12</sup>             | 2012<br>Multi-center<br>Single-blind<br>(1:1)     | DCB<br>(n=49) vs<br>PTA<br>(n=52)         | Lutonix<br>by<br>CR BARD                      | Late<br>Lumen<br>Loss at 6<br>months     | 2 years                  | NCT00930813                | 1 month<br>(3 months if<br>bail-out<br>stenting) |
| LEVANT II <sup>13-16</sup>         | 2015<br>Multi-center<br>Single-blind<br>(2:1)     | DCB<br>(n=316) vs<br>PTA<br>(n=160)       | Lutonix<br>by<br>CR BARD                      | Primary<br>Patency<br>at 1 year          | 2 years                  | NCT01412541                | 1 month                                          |
| ILLUMENATE<br>EU <sup>17</sup>     | 2017<br>Multi-center<br>Single-blind<br>(3:1)     | DCB<br>(n=222) vs<br>PTA<br>(n=72)        | Stellarex<br>by<br>Spectranetics              | Primary<br>Patency<br>at 1 year          | 2 years                  | NCT01858363                | 1 month<br>(3 months if<br>bail-out<br>stenting) |
| CONSEQUENT <sup>18</sup>           | 2017<br>Multi-center<br>Single-blind<br>(1:1)     | DCB<br>(n=78) vs<br>PTA<br>(n=75)         | SeQuent<br>Please<br>By<br>B.Braun            | Late<br>Lumen<br>Loss at 6<br>months     | 2 years                  | NCT01970579                | 2 months                                         |
| ISAR-STATH <sup>19</sup>           | 2017<br>Two-center<br>Open label<br>(1:1:1)       | DCB+BMS<br>(n=48) vs<br>PTA+BMS<br>(n=52) | IN.PACT<br>Admiral<br>by<br>Medtronic         | Diameter<br>Stenosis<br>at 6<br>months   | 2 years                  | NCT00986752                | 6 months                                         |
| ISAR-PEBIS <sup>20</sup>           | 2017<br>Two-center<br>Open label<br>(1:1) for ISR | DCB<br>(n=36) vs<br>PTA<br>(n=34)         | IN.PACT<br>Admiral<br>by<br>Medtronic         | Diameter<br>Stenosis<br>at 6-8<br>months | 2 years                  | NCT01083394                | >6 months                                        |
| IN.PACT SFA<br>JAPAN <sup>21</sup> | 2018<br>Multi-center<br>Single-blind<br>(2:1)     | DCB<br>(n=68) vs<br>PTA<br>(n=32)         | IN.PACT<br>Admiral<br>by<br>Medtronic         | Primary<br>Patency<br>at 1 year          | 2 years                  | NCT01947478                | 1 month<br>(3 months if<br>bail-out<br>stenting) |

|                                     |                                                       |                                           |                                        |                                               |         |                                 |                                                          |
|-------------------------------------|-------------------------------------------------------|-------------------------------------------|----------------------------------------|-----------------------------------------------|---------|---------------------------------|----------------------------------------------------------|
| ACOART I <sup>22</sup>              | 2016<br>Multi-center<br>Single-blind<br>(1:1)         | DCB<br>(n=100) vs<br>PTA<br>(n=100)       | Orchid<br>by<br>Acotec<br>Scientific   | Late<br>Lumen<br>Loss at 6<br>months          | 2 years | Not registered                  | 6 months                                                 |
| FINN-PTX <sup>23</sup>              | 2018<br>Multi-center<br>Open label<br>(2:1)           | DES<br>(n=28) vs<br>PTFE<br>(n=18)        | ZILVER-PTX<br>Stent by COOK<br>Medical | Secondary<br>Patency<br>at 2 years            | 2 years | NCT01450722                     | 3 months<br>(Aspirin in<br>control<br>group)             |
| BATTLE <sup>24, 25</sup>            | 2018<br>Multi-center<br>Open label<br>(1:1)           | DES<br>(n=86) vs<br>BMS<br>(n=85)         | ZILVER-PTX<br>Stent by COOK<br>Medical | In-stent<br>binary<br>restenosis<br>at 1 year | 1 year  | NCT02004951                     | >2 months<br>(clopidogrel<br>to continue<br>for 2 years) |
| DEBATE-IN-<br>SFA <sup>26</sup>     | 2018<br>Multi-center<br>Open label<br>(1:1:1)         | DES<br>(n=85) vs<br>BMS<br>(n=170)        | ZILVER-PTX<br>Stent by COOK<br>Medical | In-stent<br>binary<br>restenosis<br>at 1 year | 1 year  | UMIN0000100<br>71               | >2 months<br>(Aspirin to<br>continue<br>lifelong)        |
| DEBELLUM <sup>27, 28</sup>          | 2014<br>Single-<br>center<br>Open (1:1)               | DCB<br>(n=25) vs<br>PTA<br>(n=25)         | IN.PACT<br>Admiral<br>by<br>Medtronic  | Late<br>Lumen<br>Loss at 6<br>months          | 1 year  | Not registered                  | 1 month                                                  |
| PACIFIER <sup>29</sup>              | 2012<br>Multi-center<br>Single-blind<br>(1:1)         | DCB<br>(n=41) vs<br>PTA<br>(n=44)         | IN.PACT<br>Pacific<br>by<br>Medtronic  | Late<br>Lumen<br>Loss at 6<br>months          | 1 year  | NCT01083030                     | >2 months                                                |
| FAIR <sup>30</sup>                  | 2015<br>Multi-center<br>Single-blind<br>(1:1) for ISR | DCB<br>(n=62) vs<br>PTA<br>(n=57)         | IN.PACT<br>Admiral<br>by<br>Medtronic  | 6-month<br>binary<br>restenosis               | 1 year  | NCT01305070                     | >6 months                                                |
| BIOLUX P-I <sup>31</sup>            | 2015<br>Multi-center<br>Single-blind<br>(1:1)         | DCB<br>(n=30) vs<br>PTA<br>(n=30)         | Passeo-18 Lux<br>by<br>Biotronik       | Late<br>Lumen<br>Loss at 6<br>months          | 1 year  | NCT01056120                     | 1 month<br>(3 months if<br>bail-out<br>stenting)         |
| RANGER SFA <sup>32</sup>            | 2018<br>Multi-center<br>Single-blind<br>(2:1)         | DCB<br>(n=71) vs<br>PTA<br>(n=34)         | Ranger<br>by<br>Boston<br>Scientific   | Primary<br>Patency<br>at 1 year               | 1 year  | NCT02013193                     | >1 month                                                 |
| ILLUMENATE<br>pivotal <sup>33</sup> | 2017<br>Multi-center<br>Single-blind<br>(2:1)         | DCB<br>(n=200) vs<br>PTA<br>(n=100)       | Stellarex<br>by<br>Spectranetics       | Primary<br>Patency<br>at 1 year               | 1 year  | NCT01858428<br>&<br>NCT01912937 | 1 month                                                  |
| DEBATE-SFA <sup>34</sup>            | 2013<br>Single-<br>center<br>Open (1:1)               | DCB+BMS<br>(n=53) vs<br>PTA+BMS<br>(n=51) | IN.PACT<br>Admiral<br>by<br>Medtronic  | 1-year<br>binary<br>restenosis                | 1 year  | NCT01556542                     | 3 months                                                 |
| LUTONIX<br>JAPAN <sup>35</sup>      | 2018<br>Multi-center<br>Japan<br>(1:1)                | DCB<br>(n=71) vs<br>PTA<br>(n=38)         | Lutonix<br>by<br>CR BARD               | Primary<br>Patency<br>at 1 year               | 1 year  | Not registered                  | 1 month                                                  |

|                         |                                                      |                                            |                                                  |                                           |        |                    |                  |
|-------------------------|------------------------------------------------------|--------------------------------------------|--------------------------------------------------|-------------------------------------------|--------|--------------------|------------------|
| RAPID <sup>36</sup>     | 2017<br>Multi-center<br>Double-blind<br>(1:1)        | DCB+BMS<br>(n=80) vs<br>PTA+BMS<br>(n=80)  | LegFlow<br>by<br>Cardionovum                     | Primary<br>Patency<br>at 1 year           | 1 year | ISRCTN47846<br>578 | 3 months         |
| EFFPAC <sup>37</sup>    | 2018<br>Multi-center<br>Single-blind<br>(1:1)        | DCB<br>(n=85) vs<br>PTA<br>(n=86)          | Luminor<br>by<br>iVascular                       | Late<br>Lumen<br>Loss at 6<br>months      | 1 year | NCT02540018        | >1 month         |
| PACUBA <sup>38</sup>    | 2016<br>Dual-center<br>Single-blind<br>(1:1) for ISR | DCB<br>(n=85) vs<br>PTA<br>(n=86)          | FREEWAY<br>by<br>Eurocor                         | Primary<br>Patency<br>at 1 year           | 1 year | NCT01247402        | 3 months         |
| FREEWAY <sup>39</sup>   | 2017<br>Multi-center<br>Single-blind<br>(1:1)        | DCB+BMS<br>(n=105) vs<br>PTA+BMS<br>(n=99) | FREEWAY<br>by<br>Eurocor                         | Target<br>lesion<br>revasculari<br>zation | 1 year | NCT01960647        | Not<br>specified |
| DRECOREST <sup>40</sup> | 2018<br>Single-<br>center<br>Open (1:1)              | DCB<br>(n=30) vs<br>PTA<br>(n=30)          | IN.PACT<br>by<br>Medtronic for<br>failing bypass | Target<br>lesion<br>revasculari<br>zation | 1 year | NCT03023098        | 3 months         |

**Table S2. Design characteristics of the tested paclitaxel DES and DCB devices.**

| <b>Brand name</b> | <b>Paclitaxel dose (<math>\mu\text{g}/\text{mm}^2</math>)</b>      | <b>Excipient/spacer</b>                                        | <b>Manufacturer</b>                                 |
|-------------------|--------------------------------------------------------------------|----------------------------------------------------------------|-----------------------------------------------------|
| IN.PACT           | 3.5 $\mu\text{g}/\text{mm}^2$<br>(3.7 $\mu\text{g}/\text{mm}^2$ )  | Urea<br>(FreePac)                                              | Medtronic<br>(dose based on FDA submission)         |
| ZILVER-PTX        | 3.0 $\mu\text{g}/\text{mm}^2$<br>(0.37 $\mu\text{g}/\text{mm}^2$ ) | None<br>(polymer-free stent)                                   | COOK Medical (area adjusted dose in case of stents) |
| Cotavance         | 3.0 $\mu\text{g}/\text{mm}^2$                                      | Paccocath (Iopromide iodinated contrast)                       | Bavaria Medizin Technologie<br>MedRad, later Bayer  |
| Passeo-18 Lux     | 3.0 $\mu\text{g}/\text{mm}^2$                                      | Butyryl-tri-n-hexyl citrate (BTHC)                             | Biotronik                                           |
| SeQuent Please    | 3.0 $\mu\text{g}/\text{mm}^2$                                      | Resveratrol                                                    | B.Braun                                             |
| FREEWAY           | 3.0 $\mu\text{g}/\text{mm}^2$                                      | Shellac (shellolic and aleuritic acid resin)                   | Eurocor                                             |
| LegFlow           | 3.0 $\mu\text{g}/\text{mm}^2$                                      | Nanocrystalline 0.1- $\mu\text{m}$ paclitaxel in ammonium salt | Cardionovum                                         |
| Orchid            | 3.0 $\mu\text{g}/\text{mm}^2$                                      | Magnesium stearate                                             | Acotec Scientific                                   |
| Lutonix           | 2.0 $\mu\text{g}/\text{mm}^2$                                      | Polysorbate and sorbitol                                       | C.R. BARD                                           |
| Luminor           | 3.0 $\mu\text{g}/\text{mm}^2$                                      | Organic ester                                                  | iVascular                                           |
| Stellarex         | 2.0 $\mu\text{g}/\text{mm}^2$                                      | Polyethylene glycol                                            | Spectranetics                                       |
| Ranger            | 2.0 $\mu\text{g}/\text{mm}^2$                                      | acetyl tributyl citrate – ATBC (Transpax)                      | Boston Scientific                                   |

Nominal paclitaxel dose is expressed in micrograms/ $\text{mm}^2$  ( $\mu\text{g}/\text{mm}^2$ ). Based on the relevant FDA submission, dose is around (3.7 $\mu\text{g}/\text{mm}^2$ ) for the IN.PACT drug-coated balloon. In case of the ZILVER-PTX drug-coated stent, nominal paclitaxel dose adjusted for corresponding vessel surface area is actually 0.37 $\mu\text{g}/\text{mm}^2$  based on corresponding FDA filing data. The latter doses were used for calculation of paclitaxel dose for the purposes of meta-regression analysis.

**Table S3. Baseline patient characteristics of included randomized clinical trials.**

|                           | ZILVER-PTX |                   | THUNDER  |          | IN.PACT SFA |           | FEMPAC   |          |
|---------------------------|------------|-------------------|----------|----------|-------------|-----------|----------|----------|
|                           | DES        | PTA               | DCB      | PTA      | DCB         | PTA       | DCB      | PTA      |
| Study allocation          |            |                   |          |          |             |           |          |          |
| Patients (limbs)          | n=241      | n=238             | n=48     | n=54     | n=220       | n=111     | n=45     | n=42     |
| Age (years)               | 68±10      | 68±11             | 69±8     | 68±9     | 68±10       | 68±9      | 67±6     | 70±6     |
| Male gender               | 155 (66%)  | 152 (64%)         | 31 (65%) | 34 (63%) | 143 (65%)   | 75 (68%)  | 27 (60%) | 25 (60%) |
| Smoking                   | 204 (86%)  | 200 (84%)         | 11 (23%) | 12 (22%) | 85 (39%)    | 40 (36%)  | 21 (47%) | 15 (36%) |
| Hypertension              | 210 (89%)  | 194 (82%)         | 38 (79%) | 45 (83%) | 201 (91%)   | 98 (88%)  | 35 (78%) | 34 (81%) |
| Hyperlipidemia            | 180 (76%)  | 166 (70%)         | 33 (69%) | 34 (63%) | 186 (85%)   | 91 (82%)  | 26 (58%) | 24 (59%) |
| Diabetes mellitus         | 116 (49%)  | 100 (42%)         | 24 (50%) | 25 (46%) | 89 (41%)    | 54 (49%)  | 18 (40%) | 23 (55%) |
| Coronary artery disease   | 50 (21%)   | 41 (17%)          | NR       | NR       | 122 (57%)   | 60 (55%)  | NR       | NR       |
| Renal insufficiency       | 24 (10%)   | 25 (11%)          | NR       | NR       | NR          | NR        | NR       | NR       |
| Intermittent claudication | 217 (90%)  | 216 (91%)         | 35 (73%) | 47 (87%) | 209 (95%)   | 104 (94%) | 43 (96%) | 39 (93%) |
| Critical limb ischemia    | 24 (10%)   | 22 (9%)           | 13 (27%) | 7 (13%)  | 11 (5%)     | 7 (6%)    | 2 (4%)   | 3 (7%)   |
| Lesions treated           | n=247      | n=251             | n=86     | n=86     | n=221       | n=113     | n=100    | n=101    |
| Lesion Length (cm)        | 6.6±3.9    | 6.3±4.1           | 7.5±6.2  | 7.4±6.7  | 8.9±4.9     | 8.8±5.1   | 5.7±5.5  | 6.1±4.6  |
| Vessel Diameter (mm)      | NA         | NA                | 5.0±0.7  | 4.7±0.6  | 4.7±0.8     | 4.7±0.8   | 5.2±0.6  | 5.0±0.5  |
| Total occlusions          | 73 (30%)   | 62 (25%)          | 13 (27%) | 14 (26%) | 57 (26%)    | 22 (20%)  | (13%)    | (19%)    |
| Bail-out stenting         | NA         | (2-level random*) | 2 (4%)   | 12 (22%) | 16 (7%)     | 14 (13%)  | 4 (9%)   | 6 (14%)  |

**Table S3. Baseline patient characteristics of included randomized clinical trials (continued).**

|                           | LEVANT I |          | LEVANT II |           | ILLUMENATE EU |          | CONSEQUENT |           |
|---------------------------|----------|----------|-----------|-----------|---------------|----------|------------|-----------|
|                           | DCB      | PTA      | DCB       | PTA       | DCB           | PTA      | DCB        | PTA       |
| Study allocation          |          |          |           |           |               |          |            |           |
| Patients (limbs)          | n=49     | n=52     | n=316     | n=160     | n=222         | n=72     | n=78       | n=75      |
| Age (years)               | 67±8     | 70±10    | 68±10     | 69±9      | 67±9          | 69±9     | 68±9       | 68±9      |
| Male gender               | 34 (69%) | 30 (58%) | 193 (61%) | 107 (67%) | 160 (72%)     | 49 (68%) | 47 (60%)   | 57 (76%)  |
| Smoking                   | 15 (31%) | 20 (39%) | 111 (35%) | 54 (34%)  | 198 (89%)     | 60 (83%) | 36 (46%)   | 37 (49%)  |
| Hypertension              | 47 (96%) | 45 (87%) | 282 (89%) | 140 (88%) | 173 (78%)     | 60 (83%) | 60 (77%)   | 60 (80%)  |
| Hyperlipidemia            | 29 (59%) | 36 (69%) | 283 (90%) | 138 (86%) | 137 (62%)     | 49 (68%) | 44 (56%)   | 39 (52%)  |
| Diabetes mellitus         | 22 (45%) | 26 (50%) | 137 (43%) | 67 (42%)  | 83 (37%)      | 26 (36%) | 27 (35%)   | 29 (39%)  |
| Coronary artery disease   | 19 (39%) | 23 (44%) | 157 (50%) | 77 (48%)  | 29 (13%)      | 12 (17%) | 33 (42%)   | 30 (40%)  |
| Renal insufficiency       | NR       | NR       | 11 (4%)   | 7 (4%)    | 20 (9%)       | 6 (8%)   | 2 (3%)     | 4 (5%)    |
| Intermittent claudication | 46 (94%) | 48 (92%) | 291 (92%) | 147 (92%) | 217 (98%)     | 70 (99%) | 78 (100%)  | 75 (100%) |
| Critical limb ischemia    | 3 (6%)   | 4 (8%)   | 25 (8%)   | 13 (8%)   | 4 (2%)        | 1 (1%)   | 0 (0%)     | 0 (0%)    |
| Lesions treated           | n=49     | n=52     | n=322     | n=165     | n=254         | n=79     | n=87       | n=84      |
| Lesion Length (cm)        | 8.1±3.7  | 8.0±3.8  | 6.3±4.0   | 6.3±4.0   | 7.2±5.2       | 7.1±5.3  | 13.7±12.2  | 12.6±8.2  |
| Vessel Diameter (mm)      | 4.1±0.6  | 4.2±0.7  | 4.8±0.8   | 4.8±0.8   | 5.0±0.8       | 4.8±0.7  | 5.0±0.8    | 5.4±0.9   |
| Total occlusions          | 20 (41%) | 22 (42%) | 65 (21%)  | 35 (22%)  | 48 (19%)      | 15 (19%) | 18 (23%)   | 22 (29%)  |
| Bail-out stenting         | 12 (24%) | 14 (27%) | 8 (2.5%)  | 11 (6.9%) | 39 (15%)      | 9 (11%)  | 11 (14%)   | 14 (19%)  |

**Table S3. Baseline patient characteristics of included randomized clinical trials (continued).**

| Study allocation          | ISAR-STATH |           | IN.PACT SFA JAPAN |          | DEBELLUM |          | PACIFIER  |           |
|---------------------------|------------|-----------|-------------------|----------|----------|----------|-----------|-----------|
|                           | DCB+BMS    | PTA+BMS   | DCB               | PTA      | DCB      | PTA      | DCB       | PTA       |
| Patients (limbs)          | n=48       | n=52      | n=68              | n=32     | n=25     | n=25     | n=41 (44) | n=44 (47) |
| Age (years)               | 70±9       | 69±8      | 73±7              | 74±6     | 67±7     | 67±6     | 71±7      | 71±9      |
| Male gender               | 33 (69%)   | 37 (71%)  | 50 (74%)          | 26 (81%) | 19 (76%) | 18 (72%) | 26 (59%)  | 30 (64%)  |
| Smoking                   | 36 (75%)   | 34 (65%)  | 18 (26%)          | 10 (31%) | 17 (68%) | 14 (56%) | 21 (49%)  | 28 (60%)  |
| Hypertension              | 40 (83%)   | 40 (77%)  | NR                | NR       | 19 (76%) | 15 (60%) | 29 (66%)  | 31 (66%)  |
| Hyperlipidemia            | 45 (94%)   | 45 (87%)  | NR                | NR       | 12 (48%) | 17 (68%) | 22 (50%)  | 22 (47%)  |
| Diabetes mellitus         | 10 (21%)   | 15 (29%)  | 40 (59%)          | 18 (56%) | 13 (52%) | 9 (36%)  | 19 (43%)  | 13 (28%)  |
| Coronary artery disease   | 25 (52%)   | 24 (46%)  | 34 (50%)          | 16 (50%) | NR       | NR       | 14 (32%)  | 15 (32%)  |
| Renal insufficiency       | NR         | NR        | 6 (9%)            | 4 (13%)  | NR       | NR       | NR        | NR        |
| Intermittent claudication | 45 (94%)   | 48 (92%)  | 65 (96%)          | 31 (97%) | 23 (92%) | 22 (88%) | 42 (95%)  | 45 (96%)  |
| Critical limb ischemia    | 3 (6%)     | 4 (8%)    | 3 (4%)            | 1 (3%)   | 2 (8%)   | 3 (12%)  | 2 (5%)    | 2 (4%)    |
| Lesions treated           | n=48       | n=52      | n=68              | n=32     | n=44     | n=48     | n=44 (62) | n=47 (55) |
| Lesion Length (cm)        | 6.8±4.4    | 7.4±5.6   | 13.4±5.1          | 13.7±5.6 | 7.6±0.6  | 7.8±0.7  | 7.0±5.3   | 6.6±5.5   |
| Vessel Diameter (mm)      | 5.0±1.0    | 5.0±0.9   | 4.8±0.8           | 4.7±0.7  | NA       | NA       | 4.9±1.3   | 4.9±1.3   |
| Total occlusions          | 28 (58%)   | 35 (67%)  | 11 (16%)          | 5 (16%)  | 5 (11%)  | 9 (19%)  | 10 (23%)  | 18 (38%)  |
| Bail-out stenting         | 48 (100%)  | 52 (100%) | 3 (4%)            | 1 (3%)   | 20 (45%) | 21 (44%) | 9 (21%)   | 16 (34%)  |



**Table S3. Baseline patient characteristics of included randomized clinical trials (continued).**

|                           | ISAR-PEBIS |          | FAIR     |          | BIOLUX P-I |          | RANGER-SFA |          |
|---------------------------|------------|----------|----------|----------|------------|----------|------------|----------|
|                           | DCB        | PTA      | DCB      | PTA      | DCB        | PTA      | DCB        | PTA      |
| Study allocation          |            |          |          |          |            |          |            |          |
| Patients (limbs)          | n=36       | n=34     | n=62     | n=57     | n=30       | n=30     | n=71       | n=34     |
| Age (years)               | 70±10      | 68±10    | 69±8     | 67±9     | 70±10      | 71±10    | 68±8       | 67±9     |
| Male gender               | 24 (67%)   | 24 (70%) | 33 (53%) | 49 (70%) | 17 (57%)   | 17 (57%) | 53 (75%)   | 23 (68%) |
| Smoking                   | 21 (58%)   | 24 (71%) | 18 (29%) | 20 (35%) | 19 (63%)   | 22 (73%) | 29 (41%)   | 17 (50%) |
| Hypertension              | 33 (92%)   | 33 (80%) | 52 (84%) | 53 (93%) | 23 (77%)   | 21 (70%) | 58 (82%)   | 26 (76%) |
| Hyperlipidemia            | 35 (97%)   | 33 (97%) | 48 (78%) | 45 (79%) | 18 (60%)   | 19 (63%) | 49 (69%)   | 21 (62%) |
| Diabetes mellitus         | 12 (33%)   | 12 (35%) | 28 (45%) | 17 (30%) | 11 (37%)   | 9 (30%)  | 28 (39%)   | 12 (35%) |
| Coronary artery disease   | 17 (47%)   | 16 (47%) | 26 (42%) | 22 (39%) | 8 (27%)    | 11 (37%) | 24 (34%)   | 13 (38%) |
| Renal insufficiency       | NR         | NR       | 8 (13%)  | 10 (18%) | NR         | NR       | 8 (11%)    | 1 (3%)   |
| Intermittent claudication | 35 (97%)   | 33 (97%) | 59 (95%) | 51 (90%) | 24 (80%)   | 26 (87%) | 71 (100%)  | 31 (97%) |
| Critical limb ischemia    | 1 (3%)     | 1 (3%)   | 3 (5%)   | 6 (10%)  | 6 (20%)    | 4 (13%)  | 0 (0%)     | 1 (3%)   |
| Lesions treated           | n=36       | n=34     | n=62     | n=57     | n=33       | n=35     | n=70       | n=32     |
| Lesion Length (cm)        | 13.2±6.5   | 14.6±6.9 | 8.2±7.1  | 8.1±6.6  | 5.1±4.7    | 6.9±5.7  | 6.8±4.6    | 6.0±4.8  |
| Vessel Diameter (mm)      | 5.0±1.1    | 4.7±0.9  | 5.1±0.9  | 5.4±0.5  | 4.6±0.8    | 4.7±0.9  | 5.0±0.9    | 4.5±0.8  |
| Total occlusions          | 13 (36%)   | 10 (29%) | 15 (24%) | 19 (33%) | NR         | NR       | 24 (34%)   | 11 (34%) |
| Bail-out stenting         | NA         | NA       | NA       | NA       | 2 (7%)     | 8 (27%)  | 15 (21%)   | 4 (12%)  |

**Table S3. Baseline patient characteristics of included randomized clinical trials (continued).**

|                           | ACOART-I  |           | DEBATE-SFA |          | ILLUMENATE pivotal |          | LUTONIX JAPAN |          |
|---------------------------|-----------|-----------|------------|----------|--------------------|----------|---------------|----------|
|                           | DCB       | PTA       | DCB+BMS    | PTA+BMS  | DCB                | PTA      | DCB           | PTA      |
| Study allocation          |           |           |            |          |                    |          |               |          |
| Patients (limbs)          | n=100     | n=100     | n=53       | n=51     | n=200              | n=100    | n=71          | n=38     |
| Age (years)               | 66±9      | 66±9      | 74±9       | 76±8     | 68±10              | 70±10    | 72±10         | 78±8     |
| Male gender               | 73 (73%)  | 74 (74%)  | 50 (75%)   | 42 (63%) | 112 (56%)          | 64 (64%) | 45 (63%)      | 46 (68%) |
| Smoking                   | 29 (29%)  | 33 (33%)  | 25 (47%)   | 28 (55%) | 168 (84%)          | 75 (75%) | 53 (75%)      | 26 (68%) |
| Hypertension              | 62 (62%)  | 72 (72%)  | 47 (89%)   | 45 (88%) | 187 (94%)          | 94 (94%) | 60 (85%)      | 35 (92%) |
| Hyperlipidemia            | 27 (27%)  | 29 (29%)  | 33 (62%)   | 27 (53%) | 176 (88%)          | 90 (90%) | 47 (66%)      | 26 (68%) |
| Diabetes mellitus         | 54 (54%)  | 57 (57%)  | 41 (77%)   | 36 (71%) | 99 (50%)           | 52 (52%) | 33 (47%)      | 18 (47%) |
| Coronary artery disease   | NR        | NR        | 21 (40%)   | 18 (35%) | 90 (45%)           | 48 (48%) | 31 (44%)      | 14 (37%) |
| Renal insufficiency       | NR        | NR        | NR         | NR       | 36 (18%)           | 16 (16%) | 5 (7%)        | 2 (5%)   |
| Intermittent claudication | 60 (60%)  | 66 (66%)  | 11 (21%)   | 16 (31%) | 192 (96%)          | 95 (95%) | 71 (100%)     | 37 (97%) |
| Critical limb ischemia    | 40 (40%)  | 34 (34%)  | 42 (79%)   | 35 (69%) | 8 (4%)             | 5 (5%)   | 0(0%)         | 1 (3%)   |
| Lesions treated           | n=100     | n=100     | n=55       | n=55     | n=200              | n=100    | n=72          | n=40     |
| Lesion Length (cm)        | 14.7±11.0 | 15.2±10.9 | 9.4±6.0    | 9.6±6.9  | 8.0±4.5            | 8.9±4.6  | 6.8±4.3       | 5.7±5.1  |
| Vessel Diameter (mm)      | 3.8±0.6   | 3.7±0.8   | 5.0±0.5    | 5.1±0.5  | 4.9±0.9            | 5.2±1.1  | 4.9±0.7       | 4.7±0.7  |
| Total occlusions          | 57 (57%)  | 52 (52%)  | 30 (55%)   | 38 (69%) | 38 (19%)           | 18 (18%) | 13 (18%)      | 2 (5%)   |
| Bail-out stenting         | 19 (19%)  | 21 (21%)  | NA         | NA       | 12 (6%)            | 6 (6%)   | 1 (2%)        | 3 (8%)   |

**Table S3. Baseline patient characteristics of included randomized clinical trials (continued).**

| Study allocation          | RAPID    |          | EFFPAC   |          | FINNPTX   |           | BATTLE    |           |
|---------------------------|----------|----------|----------|----------|-----------|-----------|-----------|-----------|
|                           | DCB+BMS  | PTA+BMS  | DCB      | PTA      | DES       | PTFE      | DES       | BMS       |
| Patients (limbs)          | n=80     | n=80     | n=85     | n=86     | n=23      | n=18      | n=86      | n=85      |
| Age (years)               | 68±8     | 67±8     | 68±8     | 68±9     | 68±10     | 67±9      | 71±12     | 68±12     |
| Male gender               | 52 (65%) | 50 (63%) | 51 (60%) | 60 (70%) | 17 (74%)  | 12 (67%)  | 62 (72%)  | 62 (73%)  |
| Smoking                   | 40 (50%) | 39 (49%) | NR       | NR       | 9 (39%)   | 6 (33%)   | 20 (23%)  | 28 (33%)  |
| Hypertension              | NR       | NR       | 74 (87%) | 73 (85%) | 15 (65%)  | 15 (83%)  | 59 (69%)  | 52 (61%)  |
| Hyperlipidemia            | NR       | NR       | 60 (71%) | 59 (69%) | 13 (57%)  | 15 (83%)  | 55 (65%)  | 61 (73%)  |
| Diabetes mellitus         | 23 (29%) | 24 (30%) | 31 (37%) | 35 (41%) | 9 (39%)   | 6 (33%)   | 41 (48%)  | 22 (26%)  |
| Coronary artery disease   | NR       | NR       | NR       | NR       | 6 (26%)   | 5 (28%)   | 27 (31%)  | 34 (40%)  |
| Renal insufficiency       | NR       | NR       | NR       | NR       | NR        | NR        | 8 (9%)    | 6 (7%)    |
| Intermittent claudication | 66 (82%) | 67 (84%) | 82 (96%) | 85 (99%) | 17 (74%)  | 17 (94%)  | 68 (79%)  | 70 (82%)  |
| Critical limb ischemia    | 14 (18%) | 13 (16%) | 3 (4%)   | 1 (1%)   | 6 (26%)   | 1 (6%)    | 18 (21%)  | 15 (18%)  |
| Lesions treated           | n=80     | n=80     | n=85     | n=86     | n=23      | n=18      | n=86      | n=85      |
| Lesion Length (cm)        | 15.8±7.4 | 15.8±7.6 | 5.9±4.3  | 5.6±3.9  | 13.2±6.2  | 11.3±4.0  | 7.3±3.2   | 7.3±3.9   |
| Vessel Diameter (mm)      | 5.1±0.7  | 5.2±0.8  | 5.4±0.6  | 5.4±0.7  | NA        | NA        | 5.8±0.6   | 5.8±0.5   |
| Total occlusions          | 61 (76%) | 56 (70%) | 17 (20%) | 22 (26%) | 23 (100%) | 18 (100%) | NR        | NR        |
| Bail-out stenting         | NA       | NA       | 13 (15%) | 16 (19%) | 23 (100%) | NA        | 86 (100%) | 85 (100%) |

**Table S3. Baseline patient characteristics of included randomized clinical trials (continued).**

|                           | DEBATE in SFA |           | PACUBA    |           | DRECOREST |          | FREEWAY  |          |
|---------------------------|---------------|-----------|-----------|-----------|-----------|----------|----------|----------|
|                           | DES           | BMS       | DCB       | PTA       | DCB       | PTA      | DCB+BMS  | PTA+BMS  |
| Study allocation          |               |           |           |           |           |          |          |          |
| Patients (limbs)          | n=85          | n=170     | n=35      | n=39      | n=29      | n=28     | n=105    | n=99     |
| Age (years)               | 73±8          | 73±9      | 68±9      | 68±10     | 68±10     | 68±10    | 65±9     | 64±10    |
| Male gender               | 60 (71%)      | 112 (66%) | 20 (57%)  | 23 (59%)  | 15 (52%)  | 17 (61%) | 82 (78%) | 76 (77%) |
| Smoking                   | 24 (28%)      | 41 (24%)  | 17 (52%)  | 18 (53%)  | 17 (59%)  | 14 (50%) | 93 (89%) | 81 (82%) |
| Hypertension              | 68 (80%)      | 142 (84%) | 26 (79%)  | 27 (79%)  | 23 (79%)  | 20 (71%) | 79 (75%) | 73 (74%) |
| Hyperlipidemia            | 52 (61%)      | 101 (59%) | 18 (55%)  | 25 (74%)  | 25 (86%)  | 27 (96%) | 63 (60%) | 57 (58%) |
| Diabetes mellitus         | 50 (59%)      | 90 (53%)  | 17 (52%)  | 13 (38%)  | 11 (38%)  | 17 (61%) | 28 (27%) | 26 (26%) |
| Coronary artery disease   | 44 (52%)      | 66 (39%)  | NR        | NR        | 14 (48%)  | 11 (39%) | 26 (25%) | 23 (23%) |
| Renal insufficiency       | 17 (20%)      | 36 (21%)  | 6 (19%)   | 6 (16%)   | 6 (21%)   | 4 (14%)  | NR       | NR       |
| Intermittent claudication | 79 (93%)      | 146 (86%) | 35 (100%) | 38 (100%) | 13 (45%)  | 18 (64%) | 98 (93%) | 96 (97%) |
| Critical limb ischemia    | 6 (7%)        | 24 (14%)  | 0 (0%)    | 0 (0%)    | 16 (55%)  | 10 (36%) | 7 (7%)   | 3 (3%)   |
| Lesions treated           | n=85          | n=170     | n=35      | n=39      | n=29      | n=28     | n=105    | n=99     |
| Lesion Length (cm)        | 11.1±5.0      | 9.8±4.0   | 17.3±11.3 | 18.4±8.8  | 1.2±1.0   | 1.4±2.0  | 7.7±4.2  | 8.3±4.1  |
| Vessel Diameter (mm)      | 5.3±1.0       | 5.2±1.1   | 5.7±1.0   | 5.4±0.9   | 4.2±0.8   | 5.0±0.6  | 5.2±0.7  | 5.2±0.7  |
| Total occlusions          | 43 (51%)      | 67 (37%)  | 11 (31%)  | 11 (28%)  | 0 (0%)    | 0 (0%)   | 67 (64%) | 63 (64%) |
| Bail-out stenting         | 86 (100%)     | 85 (100%) | NA        | NA        | NA        | NA       | NA       | NA       |

**Table S4. Sensitivity analyses of rare events (Risk Ratio; 95%CI or CrI) <sup>41</sup>**

*(R 'meta' package (version 4.9-2 – Bayesian with <https://gemtc.drugis.org>)*

|                                                                                                | <b>Fixed effects</b> | <b>Random effects</b> |
|------------------------------------------------------------------------------------------------|----------------------|-----------------------|
| <b>All-cause death at 1 year</b>                                                               |                      |                       |
| Continuity correction 0.5                                                                      | 1.06 (0.73-1.55)     | 1.08 (0.72-1.61)      |
| Continuity correction 0.01                                                                     | 1.07 (0.72-1.58)     | 1.05 (0.69-1.62)      |
| Treatment arm continuity correction (TACC) <sup>42</sup>                                       | 1.06 (0.73-1.55)     | 1.07 (0.71-1.60)      |
| Mantel-Haenszel exact method<br>(no continuity correction)                                     | 1.07 (0.72-1.58)     | 1.05 (0.68-1.61)      |
| Bayesian binomial/log model (risk ratio)<br>(burn-in 50000 and inference 200000<br>iterations) | 1.59 (1.12-2.31)     | 1.64 (1.12-2.46)      |
| <b>All-cause death at 2 years</b>                                                              |                      |                       |
| Continuity correction =0.5                                                                     | 1.84 (1.27-2.68)     | 1.68 (1.15-2.47)      |
| Continuity correction =0.01                                                                    | 1.87 (1.28-2.72)     | 1.64 (1.11-2.42)      |
| Treatment arm continuity correction                                                            | 1.85 (1.27-2.69)     | 1.69 (1.15-2.48)      |
| Mantel-Haenszel exact method<br>(no continuity correction)                                     | 1.87 (1.28-2.73)     | 1.63 (1.11-2.41)      |
| Bayesian binomial/log model (risk ratio)<br>(burn-in 50000 and inference 200000<br>iterations) | 2.12 (1.48-3.13)     | 2.28 (1.45-4.27)      |
| <b>All-cause death at 4-5 years</b>                                                            |                      |                       |
| Continuity correction =0.5                                                                     | 1.94 (1.28-2.96)     | 1.93 (1.27-2.93)      |
| Continuity correction =0.01                                                                    | 1.94 (1.28-2.96)     | 1.93 (1.27-2.93)      |
| Treatment arm continuity correction                                                            | 1.94 (1.28-2.96)     | 1.93 (1.27-2.93)      |
| Mantel-Haenszel exact method                                                                   | 1.94 (1.28-2.96)     | 1.93 (1.27-2.93)      |

|                                                                                                |                  |                  |
|------------------------------------------------------------------------------------------------|------------------|------------------|
| (no continuity correction)                                                                     |                  |                  |
| Bayesian binomial/log model (risk ratio)<br>(burn-in 50000 and inference 200000<br>iterations) | 2.00 (1.35-3.11) | 2.01 (1.15-3.61) |

**Figure S1. Literature search and study selection process following the PRISMA statement.**

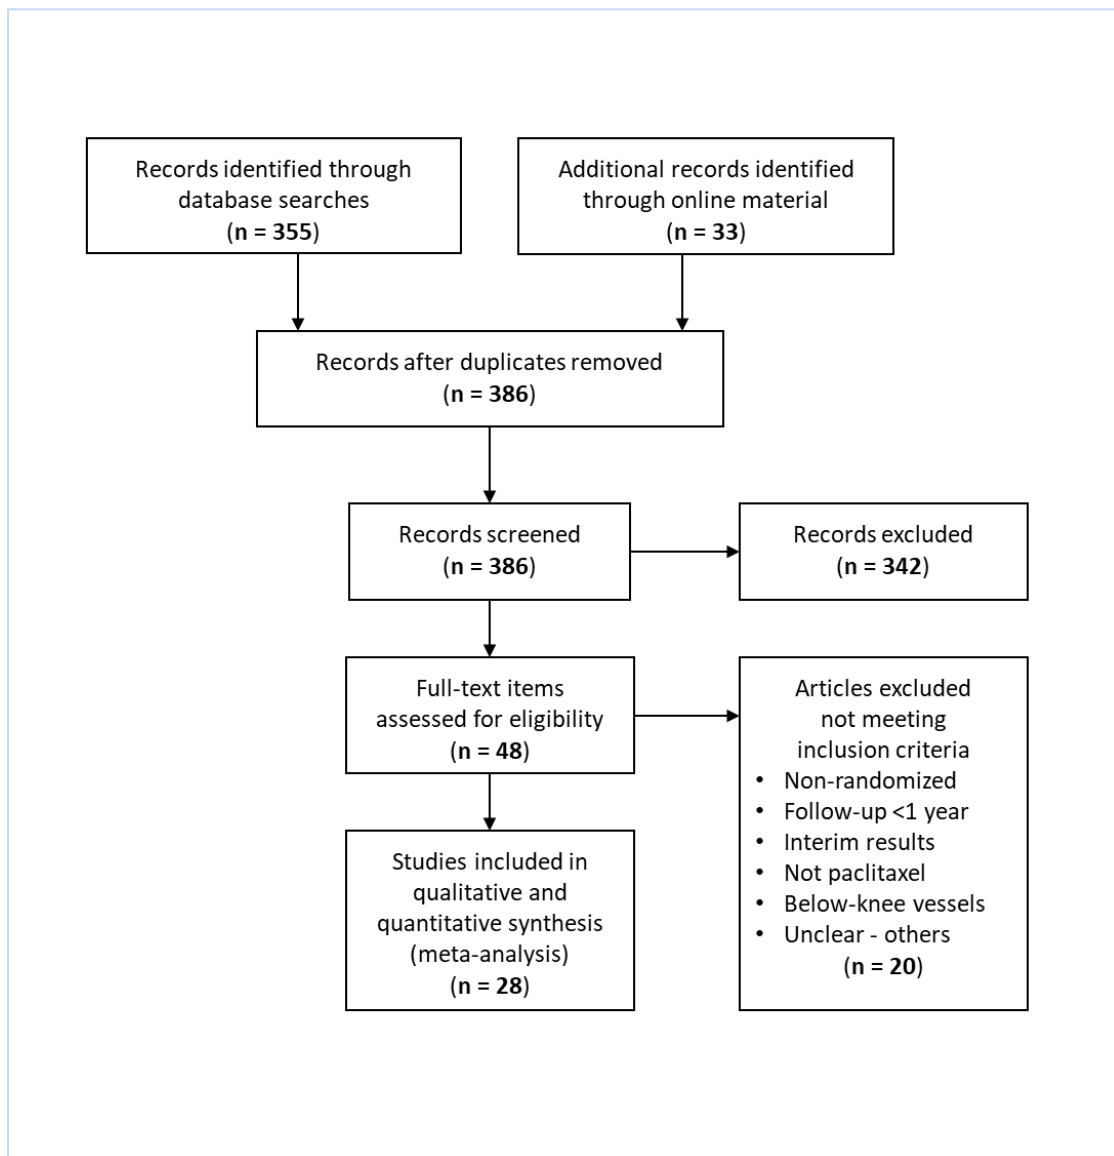

**Figure S2. Evaluation of risk of bias of each RCT according to the Cochrane Collaboration Tool.**

|                    | Random sequence generation (selection bias) | Allocation concealment (selection bias) | Blinding of participants and personnel (performance bias) | Blinding of outcome assessment (detection bias) | Incomplete outcome data (attrition bias) | Selective reporting (reporting bias) | Other bias |
|--------------------|---------------------------------------------|-----------------------------------------|-----------------------------------------------------------|-------------------------------------------------|------------------------------------------|--------------------------------------|------------|
| ACOART I           | +                                           | +                                       | -                                                         | ?                                               | +                                        | +                                    | +          |
| BATTLE             | +                                           | +                                       | -                                                         | ?                                               | +                                        | +                                    | ?          |
| BIOLUX P-I         | +                                           | +                                       | -                                                         | +                                               | +                                        | +                                    | +          |
| CONSEQUENT         | +                                           | +                                       | -                                                         | +                                               | +                                        | +                                    | +          |
| DEBATE-IN-SFA      | +                                           | +                                       | -                                                         | +                                               | +                                        | +                                    | +          |
| DEBATE-SFA         | +                                           | +                                       | -                                                         | ?                                               | +                                        | +                                    | +          |
| DEBELLUM           | +                                           | +                                       | -                                                         | -                                               | +                                        | +                                    | +          |
| DRECOREST          | +                                           | +                                       | -                                                         | -                                               | +                                        | +                                    | ?          |
| EFFPAC             | +                                           | +                                       | -                                                         | +                                               | +                                        | +                                    | +          |
| FAIR               | +                                           | +                                       | -                                                         | -                                               | +                                        | +                                    | +          |
| FEMPAC             | +                                           | +                                       | -                                                         | ?                                               | +                                        | +                                    | +          |
| FINN-PTX           | +                                           | +                                       | -                                                         | -                                               | +                                        | +                                    | ?          |
| FREEWAY            | +                                           | +                                       | -                                                         | ?                                               | +                                        | +                                    | +          |
| ILLUMENATE EU      | +                                           | +                                       | -                                                         | +                                               | +                                        | +                                    | +          |
| ILLUMENATE pivotal | +                                           | +                                       | -                                                         | +                                               | +                                        | +                                    | +          |
| IN.PACT SFA        | +                                           | +                                       | -                                                         | +                                               | +                                        | +                                    | +          |
| IN.PACT SFA JAPAN  | +                                           | +                                       | -                                                         | +                                               | +                                        | +                                    | +          |
| ISAR-PEBIS         | +                                           | +                                       | -                                                         | -                                               | +                                        | +                                    | +          |
| ISAR-STATH         | +                                           | +                                       | -                                                         | -                                               | +                                        | +                                    | +          |
| LEVANT I           | +                                           | +                                       | -                                                         | +                                               | +                                        | +                                    | +          |
| LEVANT II          | +                                           | +                                       | -                                                         | +                                               | +                                        | +                                    | +          |
| LUTONIX JAPAN      | +                                           | +                                       | -                                                         | ?                                               | +                                        | +                                    | +          |
| PACIFIER           | +                                           | +                                       | -                                                         | ?                                               | +                                        | +                                    | +          |
| PACUBA             | +                                           | +                                       | -                                                         | +                                               | +                                        | +                                    | +          |
| RANGER SFA         | +                                           | +                                       | -                                                         | ?                                               | +                                        | +                                    | +          |
| RAPID              | +                                           | +                                       | -                                                         | +                                               | +                                        | +                                    | +          |
| THUNDER            | +                                           | +                                       | -                                                         | +                                               | +                                        | +                                    | +          |
| ZILVER-PTX         | +                                           | +                                       | -                                                         | +                                               | +                                        | +                                    | +          |
| ZILVER-PTX 2nd     | +                                           | +                                       | -                                                         | +                                               | +                                        | +                                    | +          |



**Figure S3. Funnel plots of all-cause death analyses at (A) 1 year, (B) 2 years, and (C) 4-5 years of follow-up.**

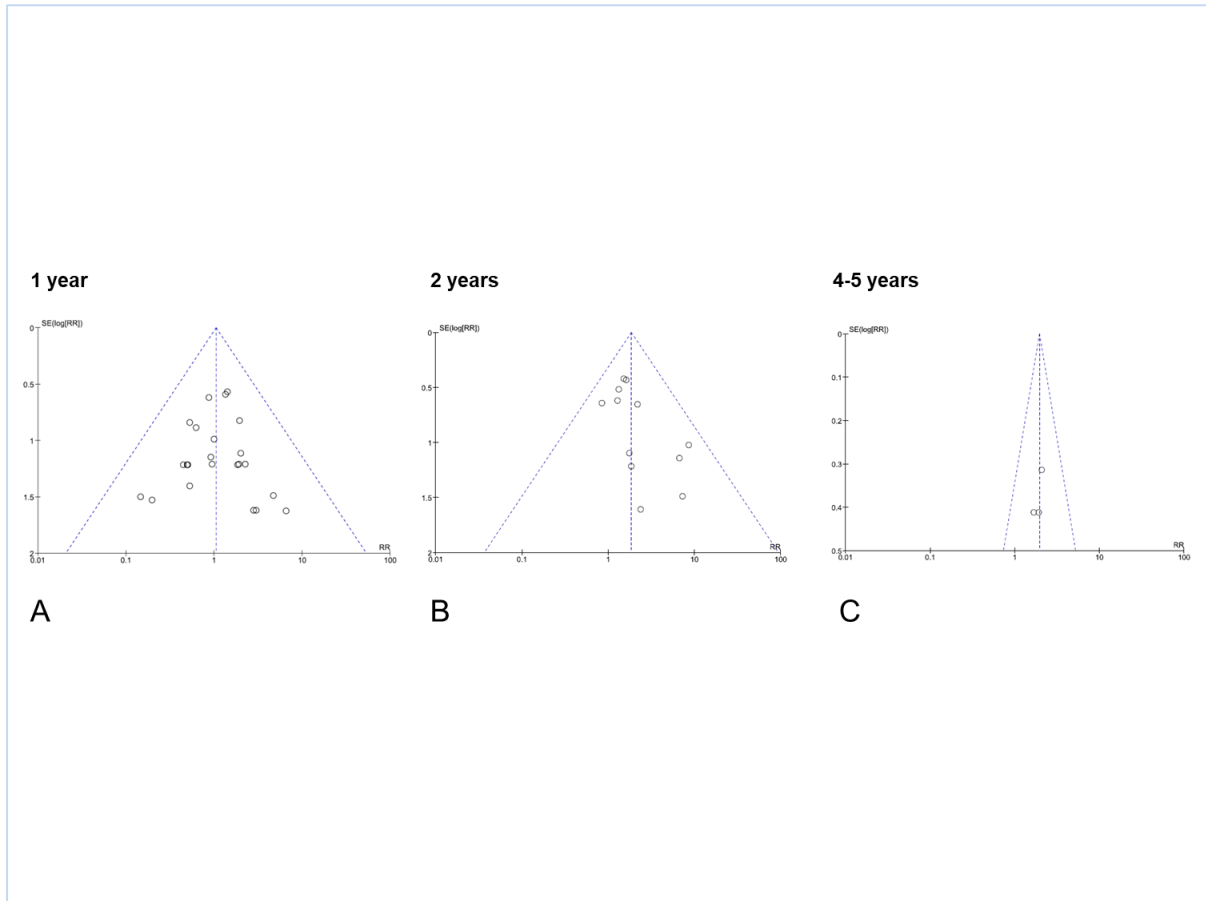

The SE of the logRR was plotted against the RR for each trial.

## Supplemental References:

1. Dake MD, Ansel GM, Jaff MR, Ohki T, Saxon RR, Smouse HB, Machan LS, Snyder SA, O'Leary EE, Ragheb AO, Zeller T and Zilver PTX. Durable Clinical Effectiveness With Paclitaxel-Eluting Stents in the Femoropopliteal Artery: 5-Year Results of the Zilver PTX Randomized Trial. *Circulation*. 2016;133:1472-83; discussion 1483.
2. Dake MD, Ansel GM, Jaff MR, Ohki T, Saxon RR, Smouse HB, Snyder SA, O'Leary EE, Tepe G, Scheinert D, Zeller T and Zilver PTX. Sustained safety and effectiveness of paclitaxel-eluting stents for femoropopliteal lesions: 2-year follow-up from the Zilver PTX randomized and single-arm clinical studies. *Journal of the American College of Cardiology*. 2013;61:2417-2427.
3. Dake MD, Ansel GM, Jaff MR, Ohki T, Saxon RR, Smouse HB, Zeller T, Roubin GS, Burket MW, Khatib Y, Snyder SA, Ragheb AO, White JK, Machan LS and Zilver PTX. Paclitaxel-eluting stents show superiority to balloon angioplasty and bare metal stents in femoropopliteal disease: twelve-month Zilver PTX randomized study results. *Circulation Cardiovascular interventions*. 2011;4:495-504.
4. Tepe G, Zeller T, Albrecht T, Heller S, Schwarzwald U, Beregi JP, Claussen CD, Oldenburg A, Scheller B and Speck U. Local delivery of paclitaxel to inhibit restenosis during angioplasty of the leg. *The New England journal of medicine*. 2008;358:689-99.
5. Tepe G, Schnorr B, Albrecht T, Brechtel K, Claussen CD, Scheller B, Speck U and Zeller T. Angioplasty of femoral-popliteal arteries with drug-coated balloons: 5-year follow-up of the THUNDER trial. *JACC Cardiovascular interventions*. 2015;8:102-8.

6. Tepe G, Laird J, Schneider P, Brodmann M, Krishnan P, Micari A, Metzger C, Scheinert D, Zeller T, Cohen DJ, Snead DB, Alexander B, Landini M, Jaff MR and Investigators IPST. Drug-coated balloon versus standard percutaneous transluminal angioplasty for the treatment of superficial femoral and popliteal peripheral artery disease: 12-month results from the IN.PACT SFA randomized trial. *Circulation*. 2015;131:495-502.
7. Laird JR, Schneider PA, Tepe G, Brodmann M, Zeller T, Metzger C, Krishnan P, Scheinert D, Micari A, Cohen DJ, Wang H, Hasenbank MS, Jaff MR and Investigators IPST. Durability of Treatment Effect Using a Drug-Coated Balloon for Femoropopliteal Lesions: 24-Month Results of IN.PACT SFA. *J Am Coll Cardiol*. 2015;66:2329-2338.
8. Schneider PA, Laird JR, Tepe G, Brodmann M, Zeller T, Scheinert D, Metzger C, Micari A, Sachar R, Jaff MR, Wang H, Hasenbank MS, Krishnan P and Investigators IPST. Treatment Effect of Drug-Coated Balloons Is Durable to 3 Years in the Femoropopliteal Arteries: Long-Term Results of the IN.PACT SFA Randomized Trial. *Circulation Cardiovascular interventions*. 2018;11:e005891.
9. FDA.  
<https://www.accessdata.fda.gov/scripts/cdrh/cfdocs/cfPMA/pma.cfm?id=P140010S0>  
15. Accessed May 2018.
10. Laird J. Long term durability of DCB treatment in the SFA: 4-year results of the IN.PACT SFA study. *LINC symposium*. January 2018;Oral presentation.
11. Werk M, Langner S, Reinkensmeier B, Boettcher HF, Tepe G, Dietz U, Hosten N, Hamm B, Speck U and Ricke J. Inhibition of restenosis in femoropopliteal arteries: paclitaxel-coated versus uncoated balloon: femoral paclitaxel randomized pilot trial. *Circulation*. 2008;118:1358-65.

12. Scheinert D, Duda S, Zeller T, Krankenberg H, Ricke J, Bosiers M, Tepe G, Naisbitt S and Rosenfield K. The LEVANT I (Lutonix paclitaxel-coated balloon for the prevention of femoropopliteal restenosis) trial for femoropopliteal revascularization: first-in-human randomized trial of low-dose drug-coated balloon versus uncoated balloon angioplasty. *JACC Cardiovascular interventions*. 2014;7:10-9.
13. Rosenfield K, Jaff MR, White CJ, Rocha-Singh K, Mena-Hurtado C, Metzger DC, Brodmann M, Pilger E, Zeller T, Krishnan P, Gammon R, Muller-Hulsbeck S, Nehler MR, Benenati JF, Scheinert D and Investigators L. Trial of a Paclitaxel-Coated Balloon for Femoropopliteal Artery Disease. *The New England journal of medicine*. 2015;373:145-53.
14. FDA.  
<https://www.accessdata.fda.gov/scripts/cdrh/cfdocs/cfPMA/pma.cfm?id=P130024>.  
Accessed May 2018.
15. Fanelli F. Optimal DCB Performance LEVANT 2 and Global SFA Real-World Registry. *LINC symposium*. January 2017;Oral presentation.
16. Banyai M. Lutonix SFA Long Lesion Study Two Year Results. *LINC symposium*. January 2018;Oral presentation.
17. Schroeder H, Werner M, Meyer DR, Reimer P, Kruger K, Jaff MR, Brodmann M and Investigators IER. Low-Dose Paclitaxel-Coated Versus Uncoated Percutaneous Transluminal Balloon Angioplasty for Femoropopliteal Peripheral Artery Disease: One-Year Results of the ILLUMENATE European Randomized Clinical Trial (Randomized Trial of a Novel Paclitaxel-Coated Percutaneous Angioplasty Balloon). *Circulation*. 2017;135:2227-2236.
18. Tepe G, Gogebakan O, Redlich U, Tautenhahn J, Ricke J, Halloul Z, Meyer DR, Waliszewski M, Schnorr B, Zeller T, Muller-Hulsbeck S, Ott I and Albrecht T.

Angiographic and Clinical Outcomes After Treatment of Femoro-Popliteal Lesions with a Novel Paclitaxel-Matrix-Coated Balloon Catheter. *Cardiovascular and interventional radiology*. 2017;40:1535-1544.

19. Ott I, Cassese S, Groha P, Steppich B, Hadamitzky M, Ibrahim T, Kufner S, Dewitz K, Hiendlmayer R, Laugwitz KL, Schunkert H, Kastrati A and Fusaro M. Randomized Comparison of Paclitaxel-Eluting Balloon and Stenting Versus Plain Balloon Plus Stenting Versus Directional Atherectomy for Femoral Artery Disease (ISAR-STATH). *Circulation*. 2017;135:2218-2226.

20. Ott I, Cassese S, Groha P, Steppich B, Voll F, Hadamitzky M, Ibrahim T, Kufner S, Dewitz K, Wittmann T, Kasel AM, Laugwitz KL, Schunkert H, Kastrati A and Fusaro M. ISAR-PEBIS (Paclitaxel-Eluting Balloon Versus Conventional Balloon Angioplasty for In-Stent Restenosis of Superficial Femoral Artery): A Randomized Trial. *Journal of the American Heart Association*. 2017;6. doi: 10.1161/JAHA.117.006321.

21. Iida O, Soga Y, Urasawa K, Saito S, Jaff MR, Wang H, Ookubo H, Yokoi H and Investigators M-SJ. Drug-Coated Balloon vs Standard Percutaneous Transluminal Angioplasty for the Treatment of Atherosclerotic Lesions in the Superficial Femoral and Proximal Popliteal Arteries: One-Year Results of the MDT-2113 SFA Japan Randomized Trial. *J Endovasc Ther*. 2018;25:109-117.

22. Jia X, Zhang J, Zhuang B, Fu W, Wu D, Wang F, Zhao Y, Guo P, Bi W, Wang S and Guo W. Acotec Drug-Coated Balloon Catheter: Randomized, Multicenter, Controlled Clinical Study in Femoropopliteal Arteries: Evidence From the AcoArt I Trial. *JACC Cardiovascular interventions*. 2016;9:1941-9.

23. Bjorkman P, Auvinen T, Hakovirta H, Ronsi P, Turtiainen J, Manninen H, Venermo M, Finn PTXsg, Lappalainen K, Alback A, Korpela A, Makinen K, Saari P

and Perala J. Drug-eluting stent shows similar patency results as prosthetic bypass in patients with femoropopliteal occlusion in a randomized trial. *Ann Vasc Surg.* 2018;53:165-170.

24. Goueffic Y, Kaladji A, Guyomarch B, Montagne C, Fairier D, Gestin S, Riche VP, Vent PA, Chaillou P, Costargent A and Patra P. Bare metal stent versus paclitaxel eluting stent for intermediate length femoropopliteal arterial lesions (BATTLE trial): study protocol for a randomized controlled trial. *Trials.* 2014;15:423.

25. Goueffic Y. BATTLE trial: 1 year outcomes in a multicenter randomized trial comparing MISAGO® vs. ZILVER® PTX® for the treatment of intermediate length femoropopliteal lesions *Charing Cross Symposium.* April 2018;Oral presentation.

26. Miura T, Miyashita Y, Soga Y, Hozawa K, Doijiri T, Ikeda U, Kuwahara K and investigators. DiS. Drug-Eluting Versus Bare-Metal Stent Implantation With or Without Cilostazol in the Treatment of the Superficial Femoral Artery. The DEBATE in SFA Study. *Circulation Cardiovascular interventions.* 2018;11.

27. Fanelli F, Cannavale A, Corona M, Lucatelli P, Wlдерk A and Salvatori FM. The "DEBELLUM"--lower limb multilevel treatment with drug eluting balloon-- randomized trial: 1-year results. *The Journal of cardiovascular surgery.* 2014;55:207-16.

28. Fanelli F, Cannavale A, Boatta E, Corona M, Lucatelli P, Wlдерk A, Cirelli C and Salvatori FM. Lower limb multilevel treatment with drug-eluting balloons: 6-month results from the DEBELLUM randomized trial. *Journal of endovascular therapy : an official journal of the International Society of Endovascular Specialists.* 2012;19:571-80.

29. Werk M, Albrecht T, Meyer DR, Ahmed MN, Behne A, Dietz U, Eschenbach G, Hartmann H, Lange C, Schnorr B, Stiepani H, Zoccai GB and Hanninen EL.

Paclitaxel-coated balloons reduce restenosis after femoro-popliteal angioplasty: evidence from the randomized PACIFIER trial. *Circulation Cardiovascular interventions*. 2012;5:831-40.

30. Krankenberg H, Tubler T, Ingwersen M, Schluter M, Scheinert D, Blessing E, Sixt S, Kieback A, Beschorner U and Zeller T. Drug-Coated Balloon Versus Standard Balloon for Superficial Femoral Artery In-Stent Restenosis: The Randomized Femoral Artery In-Stent Restenosis (FAIR) Trial. *Circulation*. 2015;132:2230-6.

31. Scheinert D, Schulte KL, Zeller T, Lammer J and Tepe G. Paclitaxel-releasing balloon in femoropopliteal lesions using a BTHC excipient: twelve-month results from the BIOLUX P-I randomized trial. *Journal of endovascular therapy : an official journal of the International Society of Endovascular Specialists*. 2015;22:14-21.

32. Bausback Y, Willfort-Ehringer A, Sievert H, Geist V, Lichtenberg M, Del Giudice C, Sauguet A, Diaz-Cartelle J, Marx C, Strobel A, Schult I, Scheinert D and Investigators RS. Six-Month Results From the Initial Randomized Study of the Ranger Paclitaxel-Coated Balloon in the Femoropopliteal Segment. *J Endovasc Ther*. 2017;24:459-467.

33. Krishnan P, Faries P, Niazi K, Jain A, Sachar R, Bachinsky WB, Cardenas J, Werner M, Brodmann M, Mustapha JA, Mena-Hurtado C, Jaff MR, Holden AH and Lyden SP. Stellarex Drug-Coated Balloon for Treatment of Femoropopliteal Disease: Twelve-Month Outcomes From the Randomized ILLUMENATE Pivotal and Pharmacokinetic Studies. *Circulation*. 2017;136:1102-1113.

34. Liistro F, Grotti S, Porto I, Angioli P, Ricci L, Ducci K, Falsini G, Ventoruzzo G, Turini F, Bellandi G and Bolognese L. Drug-eluting balloon in peripheral intervention for the superficial femoral artery: the DEBATE-SFA randomized trial (drug eluting

balloon in peripheral intervention for the superficial femoral artery). *JACC*

*Cardiovascular interventions*. 2013;6:1295-302.

35. PMDA.

[http://www.pmda.go.jp/medical\\_devices/2017/M20170830001/780045000\\_22900BZ\\_X00252000\\_A100\\_1.pdf](http://www.pmda.go.jp/medical_devices/2017/M20170830001/780045000_22900BZ_X00252000_A100_1.pdf). Accessed May 2018.

36. de Boer SW, van den Heuvel DAF, de Vries-Werson DAB, Vos JA, Fioole B, Vroegindeweij D, Elgersma OE, Tutein Nolthenius RP, Heyligers JMM, Bosma GPT, de Leeuw B, Bouwman LH, Bockler D, Dovzhanskiy DI, Vos FWF, Vink TWF, Hooijboer PGA, Hissink RJ and de Vries JPM. Short-term Results of the RAPID Randomized Trial of the Legflow Paclitaxel-Eluting Balloon With Supera Stenting vs Supera Stenting Alone for the Treatment of Intermediate and Long Superficial Femoral Artery Lesions. *J Endovasc Ther*. 2017;24:783-792.

37. Teichgraber U, Aschenbach R, Scheinert D and et al. EffPac-Trial: Effectiveness of LUMINOR® DCB versus POBA in the SFA: 12 months results. *Charing Cross Symposium*. April 2018;Oral presentation.

38. Kinstner CM, Lammer J, Willfort-Ehringer A, Matzek W, Gschwandtner M, Javor D, Funovics M, Schoder M, Koppensteiner R, Loewe C, Ristl R and Wolf F. Paclitaxel-Eluting Balloon Versus Standard Balloon Angioplasty in In-Stent Restenosis of the Superficial Femoral and Proximal Popliteal Artery: 1-Year Results of the PACUBA Trial. *JACC Cardiovascular interventions*. 2016;9:1386-92.

39. Tacke J. The randomized Freeway Stent Study completed the 12-month follow-up and favored the use of drug-eluting balloons over plain balloons for the postdilatation of nitinol stents in the SFA and PI segments to lower restenosis rate. *CIRSE symposium*. September 2017;Oral presentation.



40. Bjorkman P, Kokkonen T, Alback A and Venermo M. Drug-coated vs. Plain Balloon Angioplasty in Bypass Vein Grafts (the DRECOREST I-study). *Ann Vasc Surg*. 2018 Aug 6. [Epub ahead of print].
41. Efthimiou O. Practical guide to the meta-analysis of rare events. *Evidence-based mental health*. 2018;21:72-76.
42. Sweeting MJ, Sutton AJ and Lambert PC. What to add to nothing? Use and avoidance of continuity corrections in meta-analysis of sparse data. *Statistics in medicine*. 2004;23:1351-75.
